# Supplementary material for: Trends and spatial variation of oceanic dimethyl sulfide under a warming climate revealed by an artificial neural network model
Source: Copernicus journal article supplement (doi:10.5194/egusphere-2025-3185), 2025-07-08
Supplement: Supplementary file [file egusphere-2025-3185-RC2-supplement.pdf]

# 1 General comments

Yan and Wang (hereafter YW25) present a study of oceanic dimethyl sulfide (DMS) modeled by an artificial neural network (ANN) over historical (1850–2014) and SSP5-8.5 (2015–2100) CMIP6 scenario. DMS is the main natural source of sulfur in the atmosphere, which contributes to aerosol formation, and ultimately affects the Earth radiative forcing, and thus the climate. Previous modeling studies have shown large discrepancies in the projected evolution of DMS. Thus, developing robust methods to model DMS is of high importance to reduce the uncertainty in climate models.

Despite the importance of this subject, the study proposed by YW25 presents major issues. In this section, general comments are presented, and more details are provided in the Specific Comments section for some of them.

The primary concern with YW25 paper is about scientific integrity. The ANN used in this study was developed 5 years ago by Wang et al. (2020, hereafter referred to as W20), and one can thus expect the method presented here to be essentially identical to that of W20. However, one would also expect the entire process to be revisited and updated if needed, for instance with new input data that has been published since 2020. Instead, several parts of this paper have simply been duplicated from W20. The original study is not acknowledged, and the reference to W20 is not even present in the bibliography. More concerning is that a whole subsection of the paper, two figures, and a table strongly resemble published material from other authors. This will be presented with more details in the Specific comments section of this review.

Another major issue (which is partly linked to the previous remark) is that this work lacks novelty. It is similar to existing work, and does not provide significant new insights. The recent study by Joge et al. (2025, hereafter referred to as J25) uses a similar modeling technique (but is trained on more complete observational datasets), and provides a more thorough investigation of several climatic scenarios (only one of which is evaluated here). J25 uses forcing data from a multimodel ensemble (instead of a single model here). While an interesting comparison could be made to identify and address the differences between the two studies, the analysis of the respective results is weak and limited. For example, the differences in concentration and flux during the historical period are not mentioned in the paper, even though it is surprising that the ANN computes a larger concentration but a smaller flux than the J25 model. The diverging trend in DMS flux between the two studies for the 2050–2100 period (+0.37 and −0.37 % per decade in J25 and this study, respectively, see Table 2) is not clearly established in the paper despite being one of the most important expected result from such a study.

Several methodological aspects are vague, or even flawed. This is especially the case regarding the choice of a single model (CESM2-WACCM) to provide input data for the ANN. The paper states that CESM2-WACCM is the best CMIP6 model for eight variables, but some of the provided data suggest otherwise. The evaluation of uncertainty range is neither explained, nor discussed (despite being significantly larger than in other studies).

Lastly, the presentation of the paper is poor. There are missing references and inconsistencies throughout the text. Some statements attributed to other studies are wrong. Several figures are barely readable. A number of misspelled words reveal that the paper was not even spell-checked before submission.

In summary, this paper has major weaknesses and lacks scientific rigor. In my opinion, it does not meet the quality standards required for publication in Earth System Dynamics.

## 2 Specific comments

### 2.1 Copies from other papers

Section 2.1 (Observations) is largely copied and pasted from W20. The last access date (May 1, 2020) has not been updated. Although it is acceptable to reuse the same method as in the previous study by Wang et al. (2020), this should be clearly stated and referenced. It would have been expected to use an updated dataset of DMS measurements. Note that two references (Behrenfeld et al., 2019; Schmidtke et al., 2013) are also missing from the bibliography: again, no adjustments were made after copying.

Section 2.2 (Earth System Models): apart from the first two paragraphs, each CMIP6 model description is copied from Bock et al. (2021, hereafter B21), with less information (see Table R2 for a side-by-side comparison).

In Section 2.3 (Artificial neural network model), paragraphs 2 and 3 are mostly copied from W20. Using the same method/model is acceptable, but this should be explicitly acknowledged.

Section 2.4 (Sea-to-air flux of DMS; lines 191–206) is an exact (but partial) copy of W20. As previously mentioned, the text from W20 was not adapted: for example, the abbreviation “GM12” for the Goddijn-Murphy et al. (2012) paper has been copied from W20 but is never used throughout this paper.

Figure 2 strongly resembles Figure 9 from B21. Time series from J25 and the present study have been added to it. However, given the resemblance, one would expect to see a mention of “adapted from” and the source. In this figure, the solid lines are too thick, and the envelopes surrounding the solid lines are not explained in the caption. They also seem different from those displayed in B21 Fig. 9. Why is that? The data from J25 is incomplete since it does not include the uncertainty range provided in their study. This range is very important information for such a study.

Figure 5 strongly resembles Figure 1 from Quinn and Bates (2011, hereafter referred to as QB11), which discusses the CLAW hypothesis after the publication of Charlson et al. (1987). Both are shown in Appendix (Fig. R1). The caption of Fig. 5 is a copy of the caption from QB11 (“Modified diagram of the climate feedback loop of DMS”), but QB11 clearly states the reference from which it was “modified” (their caption continues by: “[. . .] feedback loop proposed by ref. 7”). Additionally, the caption of Fig. 5 is limited to a title. An explanation of the sketch, including the significance of the plus and minus signs, should have been provided. Only five out of the eight variables (SST, MLD,  $\text{NO}_3$ ,  $\text{PO}_4$ ,  $\text{SiO}_4$ ) are displayed, while the other three (Chl a, SSS, PAR) are not displayed, without explanation or justification. The authors attribute a sign to the effect of these changing variables on DMS; however, this contradicts their own conclusions (line 375) “Our results demonstrate that variations in DMS concentration are rarely unidirectional in response to isolated changes in a single environmental parameter (Fig. 5).”

Fig S3b is an exact copy of Figure 1b from W20. Note the rounding error for  $R^2$  (0.6673 in Fig S3b, rounded as 0.66 in the text, line 211), as well as the inconsistency with N values (lines 170–171).

Table S1 is nearly identical to Table A1 in W20. Two out of four URLs are no longer valid. The “last access” dates have not been updated since W20 (“1 May 2020”). The Table caption has been modified compared to W20 but contains a mistake (“DMS and environmental parameters data sources”). All the references provided in this Table are missing from the bibliography, further evidencing that no adjustments were made after copying from the W20 paper.

Table S2 is a copy of two tables in B21 (Table 1 for the three columns on the left and Table 2 for the two columns on the right). The copy is obvious in this table since the number of CMIP6

model realizations displayed in the last two columns is no longer up to date (more realizations are now available for almost all models and scenarios compared to 2021).

## 2.2 Justification of CESM2-WACCM choice, use of CMIP6 models

In several places in their paper (lines 116–118, 213–214, and 235–236), YW25 claim that CESM2-WACCM outperforms other CMIP6 models in reproducing the eight environmental variables used as input in the ANN. They refer to Figure S4 (and mistakenly to Figure S6, which does not exist; line 118) to support this statement. However, Figure S4 does not demonstrate that CESM2-WACCM is superior.

Figure S4 presents two metrics to evaluate model performance against measurements:  $R^2$  values, and a percentile in color bar. The second metric is not explained in the "Methods" section of the paper and is nearly impossible to read in the figure, even on a large screen. Using only the reported  $R^2$  values for the eight variables and computing the mean  $R^2$  over eight variables for seven models, it appears that CESM2-WACCM is only the third-best model (Table R1).

| Model        | Chl a  | MLD    | DIN    | PAR    | DIP    | SiO <sub>4</sub> | SSS    | SST    | mean  | rank |
|--------------|--------|--------|--------|--------|--------|------------------|--------|--------|-------|------|
| CESM2        | 0.2163 | 0.2317 | 0.9097 | 0.5316 | 0.8797 | 0.7826           | 0.8448 | 0.9465 | 0.668 | 4    |
| CESM2-WACCM  | 0.2519 | 0.2616 | 0.9109 | 0.5345 | 0.8836 | 0.7638           | 0.8402 | 0.9470 | 0.674 | 3    |
| NorESM2-LM   | 0.2163 | 0.1022 | 0.7570 | 0.5319 | 0.7805 | 0.6606           | 0.8980 | 0.9370 | 0.610 | 6    |
| NorESM2-MM   | 0.2682 | 0.1125 | 0.7074 | 0.5304 | 0.7692 | 0.6206           | 0.9054 | 0.9421 | 0.607 | 7    |
| EC-Earth3-CC | 0.3206 | 0.2621 | 0.9103 | 0.5177 | 0.7961 | 0.7982           | 0.8570 | 0.9345 | 0.675 | 2    |
| GFDL-ESM4    | 0.5607 | 0.1829 | 0.8525 | 0.5236 | 0.8372 | 0.8664           | 0.8147 | 0.9470 | 0.698 | 1    |
| IPSL-CM6A-LR | 0.2210 | 0.2131 | 0.9032 | 0.5066 | 0.7899 | 0.8867           | 0.8052 | 0.9429 | 0.659 | 5    |

Table R1:  $R^2$  values provided in Figure S4. Here, the mean over eight variables is computed for each model, and the resulting rank is provided. CESM2-WACCM ranks third.

The claim that CESM2-WACCM is superior is not supported and appears flawed. The authors also state that "other models exhibit significant biases" (line 236), but this is clearly not true, considering the relatively narrow range of correlation coefficients for all models, including CESM2-WACCM (Table R1).

More generally, the authors' choices regarding the presentation and selection of the CMIP6 models are questionable. In Section 2.2, CESM2-WACCM is presented as "the best [...] among the CMIP6 ensembles" (line 117) without being described. Then, the four CMIP6 models that compute DMS concentration and flux are presented in great detail from lines 129 to 152. However, none of this information is used later in the paper to explain or analyze the differences in the results. What is the purpose of this extended model description? The same question can be asked about Table S2, which also ignores CESM2-WACCM; the information in this table is never referenced in the paper.

Regarding Figure S4, which supposedly justifies why CESM2-WACCM is better, three out of the four CMIP6 models presented in detail in Section 2.2 (CNRM-ESM2-1, MIROC-ESM2-L, and UKESM1-0-LL) are missing. Why were these models excluded from the comparison? Conversely, what led to the selection of these seven models? The model data is not clearly stated either (which, and how many simulations are presented on this Figure?). What justifies the selection of two pairs of similar models (CESM2 and CESM2-WACCM, which differ in their atmospheric chemistry scheme; and NorESM2, which has two distinct resolutions, LM and MM)?

Last but not least, one strength of climate model simulations is the range of variability that

can be assessed from multiple realizations. However, it is unclear whether the authors used one or multiple realizations of CESM2-WACCM in their study. No information is provided regarding the number of available simulations (although this information is provided for other models in Table S2). Tables 1 and 2 provide uncertainty ranges without explanation of how they were evaluated. Conversely, Figure 2 shows only the mean global average, not the uncertainty. This clearly reduces the value of the study and limit its comparability with other studies.

### 2.3 Other specific comments

(23, 256) "decrease at a rate of 0.37 [...]". A decrease rate should be written with a minus sign.  
 (42) Presenting the CLAW hypothesis in 2025 is not appropriate, since this early study has been extensively revisited (see, for instance, Woodhouse et al., 2010, SB11, or Brévière et al., 2015). Stating that this hypothesis "is increasingly challenged by emerging evidence" (l. 47) is inadequate.

(173) Refer to the a specific paper demonstrating the overfitting of random separation method. This is mentioned, but not demonstrated by W20.

(188) "DMS flux is calculated using an empirical formula, which takes into account sea surface wind (SSW), sea ice coverage, and the viscosity coefficient related to gas transfer velocities in atmosphere and surface ocean." This description is not consistent with the formulas presented later (lines 192 and 202), which do not include sea surface wind (at least, not explicitly) or sea ice coverage. The flux calculation description provided in this section is not precise or complete enough to reproduce the results.

(222) YW25 comment about DMS concentration here, but refer to the study by Hamilton et al. (2014) which deals with CCN in pristine environments. The relative contribution of DMS to CCN is not established here and has been shown to be small by Woodhouse et al. (2010). Furthermore, Hamilton et al. (2014) points out that sea spray is the dominant source of aerosol, which contradicts your point: "A Southern Ocean summertime band of pristine CCN exists between 50°S and 65°S, with generally low monthly mean PD CCN concentrations of 20–153 cm<sup>-3</sup> (median 58 cm<sup>-3</sup>), when natural emissions of sea spray are the dominant aerosol source (17)." (p. 18468)

(228–234) The analysis of discrepancies with J25 results is weak, and fails to address the main arguments: the model developed by J25 is specifically trained and applied over four biomes. Then, the results are combined to obtain global DMS concentrations (J25, Fig. 1). J25 also use the most recent database of DMS, which contains 853,343 filtered data points, while YW25 use a more limited dataset of 93,571 filtered data points. Consequently, in J25 study, DMS measurements are captured with significantly higher correlation coefficient (R=0.86; J25 p. 2) than with the ANN, which was randomly trained and tested over 14 and 15 (respectively) latitude bands encompassing all biomes.

(259) There is no such conclusion in B21, who wrote (only about the DMS flux): "A bias in modelled SST can thus contribute to the bias in flux calculation, but it is estimated to be smaller than the uncertainty of flux parameterisation." (p. 3836). This does not refer to the divergence of CMIP6 models. Additionally, the purpose of this study is not to evaluate differences in CMIP6 models, so this (wrong) citation is outside the scope of the paper.

(264) "at their initial histori[c]al values": an accurate description of the sensitivity experiment should be provided in the Methods section. The initial historical value is not explicit. Is it the first timestep, the first annual mean, or the mean over a longer period?

(311) "Moreover, nutrient-dependent effects significantly explain seasonal variability, particularly as phytoplankton growth becomes nutrient-limited during summer time." This is not supported by your work, add a citation.

(314–317) add a citation

(323) "No key driving factors of DMS variation are identified in the polar North and coastal regions, likely because these areas encompass diverse biomes with site-specific drivers." The precise meaning, and associated geographical extent, of the term "biome" should probably be clarified, as different authors use it in different ways. For example, J25 divided the global ocean into four "biomes": polar, trades, westerlies, and coastal. But whatever the word used, in this part of the study, the sensitivity of DMS is analyzed in six "regions". For two of these regions, which show weak correlation with all environmental variables used as input, the authors justify this by saying that these regions "encompass diverse biomes". Yet the other four regions surely also encompass diverse biomes and present stronger correlations. Therefore, this cannot be a valid argument explaining why no key driving factors stand out in the Polar North and coastal regions. This is also inconsistent with other statements in the paper. For instance, lines 329–331 state: "These results suggest that low nutrient levels, strong light, and warm surface waters may favor small phytoplankton or *Phaeocystis*, which are more prolific DMS producers compared to diatoms." These statements attempt to demonstrate that the ANN could capture the underlying biological processes responsible for DMS production. If the ANN can do so in some regions, why would it fail in others?

(326) "In contrast, DMS concentrations in the westerlies North region show strong negative correlations with DIN ( $r = -0.46$ ), DIP ( $r = -0.58$ ), and  $\text{SiO}_4$  ( $r = -0.31$ ), and strong positive correlations with PAR ( $r = 0.60$ ), SSS ( $r = 0.52$ ), and SST ( $r = 0.53$ )." It is unbelievable that an  $r$  value as low as 0.31 (and not higher than 0.60) would be considered a "strong correlation" in a scientific paper.

(326) These results should be compared with the available literature, McNabb and Tortell (2022) for instance.

(329) "[...] small phytoplankton or *Phaeocystis*, which are more prolific DMS producers compared to diatoms." This is not supported by your work, add a citation.

(345–355) This whole paragraph is not really a discussion about the ANN results, and would rather be in the Introduction.

(356, 367) "Our results demonstrate that DMS concentrations exhibit regional-scale dependence on multiple environmental drivers (Fig. 5)." This is not a new result: W20 already showed in their sensitivity tests that changes in DMS concentration exhibit strong regional variations (including opposite signs) when the drivers are perturbed individually (Fig. 9 in W20).

(571) In Table 1 and 2, uncertainty ranges (standard deviation) are provided. The first question, mentioned earlier, is: where does it come from? Is it based on the use of several model realizations for the input data? From both Tables, it appears that the ANN uncertainty is significantly higher than in all other studies, why is that?

### 3 Technical corrections

Here, I report only a short list of blatant mistakes, that would have been avoided if a spell-check had been performed before submitting.

- (103) "Simillarly"
- (173) "measurments"
- (185) "finetune"
- (232) "devrived"
- (240) "discrepancies"

- (260) "modelled"
- (264) "paramters"
- (264) "historial"
- (286) "decrasing"
- (292) "differe"
- (297) "bacaue"
- (318) "temperol"
- (320) "variabilities"
- (Table S1) "paraments"

## 4 Appendix

Table R2: Side-by-side comparison of CMIP6 model description by B21 (left column) and YW25 (right column) showing strikingly strong resemblance.

| B21 (Sect. 2.1.1 pages 3825–3826)                                                                                                                                                                                                                                                                                                                                                                                                                                                                                                                                                                                          | YW25 (Sect. 2.2 lines 129–152)                                                                                                                                                                                                                                                                                                                                                                                                                                        |
|----------------------------------------------------------------------------------------------------------------------------------------------------------------------------------------------------------------------------------------------------------------------------------------------------------------------------------------------------------------------------------------------------------------------------------------------------------------------------------------------------------------------------------------------------------------------------------------------------------------------------|-----------------------------------------------------------------------------------------------------------------------------------------------------------------------------------------------------------------------------------------------------------------------------------------------------------------------------------------------------------------------------------------------------------------------------------------------------------------------|
| <p>In CNRM-ESM2-1, DMS concentration is computed by the biogeochemical model PISCES (Aumont and Bopp, 2006), embedded within the global general ocean circulation model NEMO.</p> <p>[...]</p> <p>The version of PISCES used in CNRM-ESM2-1 for CMIP6 is PISCESv2-gas, based on PISCES-v2 (Aumont et al., 2015) with the addition of a specific module to compute the cycle of gases relevant to climate.</p> <p>[...]</p> <p>The fluxes to the atmosphere are then computed using the parameterisation of gas exchange coefficients of Wanninkhof (2014).</p> <p>[...]</p> <p>(see Michou et al., 2020, for details).</p> | <p>For the CNRM-ESM2-1 model, DMS concentrations are computed using the biogeochemical model PISCES,</p> <p>coupled with the global ocean general circulation model (OGCM) NEMO.</p> <p>The version of PISCES used, PISCESv2-gas,</p> <p>includes a module for simulating</p> <p>the cycle of gases relevant to climate.</p> <p>DMS flux is calculated using the parameterization of gas exchange coefficients of Wanninkhof (2014)</p> <p>(Michou et al., 2020).</p> |
| <p>NorESM2-LM includes a fully interactive description of the DMS cycle</p> <p>[...]</p> <p>DMS is directly released in the water and is computed as a function of temperature and simulated detritus</p>                                                                                                                                                                                                                                                                                                                                                                                                                  | <p>For the NorESM2-LM model,</p> <p>[...]</p> <p>DMS concentrations, which is</p> <p>a function of temperature and</p>                                                                                                                                                                                                                                                                                                                                                |

|                                                                                                                                                                                                                                                                                                                                                                                                                                                                                                                                                                                                                                                                                                                                                                                                                                                                                                                                                                                                                                                                                            |                                                                                                                                                                                                                                                                                                                                                                                                                                                                                                                                                                                                                                                                                                 |
|--------------------------------------------------------------------------------------------------------------------------------------------------------------------------------------------------------------------------------------------------------------------------------------------------------------------------------------------------------------------------------------------------------------------------------------------------------------------------------------------------------------------------------------------------------------------------------------------------------------------------------------------------------------------------------------------------------------------------------------------------------------------------------------------------------------------------------------------------------------------------------------------------------------------------------------------------------------------------------------------------------------------------------------------------------------------------------------------|-------------------------------------------------------------------------------------------------------------------------------------------------------------------------------------------------------------------------------------------------------------------------------------------------------------------------------------------------------------------------------------------------------------------------------------------------------------------------------------------------------------------------------------------------------------------------------------------------------------------------------------------------------------------------------------------------|
| <p>export production (Tjiputra et al., 2020).</p> <p>In MIROC-ES2L, the seawater concentration of DMS is computed according to the parameterisation of Aranami and Tsunogai (2004), which relates the sea surface DMS concentration to the MLD and to surface water Chl concentration.</p> <p>[...]</p> $\text{DMS} = \begin{cases} 60.0/\text{MLD} & \text{if } \text{Chl}/\text{MLD} < 0.02 \text{ mg m}^{-4} \\ 55.8 \cdot (\text{Chl}/\text{MLD}) + 0.6 & \text{if } \text{Chl}/\text{MLD} \geq 0.02 \text{ mg m}^{-4} \end{cases}$ <p>Both MLD and Chl are simulated by the ocean biogeochemical model OECO-v2 embedded in MIROC-ES2L (Hajima et al., 2020).</p> <p>[...]</p> <p>The flux of DMS to the atmosphere is also computed according to Aranami and Tsunogai (2004).</p>                                                                                                                                                                                                                                                                                                     | <p>export production (Tjiputra et al., 2020).</p> <p>In the MIROC-ES2L model, DMS concentrations are calculated based on the Aranami and Tsunogai (2004) parameterization, which links sea surface DMS concentrations to MLD and Chl-a concentration as follows:</p> $\text{DMS} = \begin{cases} \frac{60.0}{\text{MLD}} & \text{if } \frac{\text{Chl}}{\text{MLD}} < 0.02 \\ 55.8 \cdot \left(\frac{\text{Chl}}{\text{MLD}}\right) + 0.6 & \text{if } \frac{\text{Chl}}{\text{MLD}} > 0.02 \end{cases}$ <p>in which MLD and Chl a are simulated by OECO-v2, coupled in MIROC-ES2L (Hajima et al., 2020).</p> <p>DMS flux is calculated using Aranami and Tsunogai (2004) parameterization.</p> |
| <p>In UKESM1-0-LL, the seawater concentration of DMS is computed within the ocean biogeochemistry model MEDUSA (Yool et al., 2013) and is interactively coupled with the atmosphere. The parameterisation of DMS concentration is based on the work by Anderson et al. (2001) and linearly relates the DMS concentration to a composite variable formed by the logarithm of the product of Chl concentration (<math>C</math>, <math>\text{mg m}^{-3}</math>), light (<math>J</math>, mean daily shortwave, <math>\text{W m}^{-2}</math>), and a nutrient term (<math>Q</math>, dimensionless) that depends on nitrate concentration.</p> <p>[...]</p> <p>Finally, the flux of DMS from the surface ocean to the atmosphere is parameterised according to the air-sea gas transfer scheme of Liss and Merlivat (1986)<sup>1</sup>. DMS concentration in the atmosphere is subsequently modified through a number of gas-phase aerosol precursor reactions of the UKESM1-0-LL stratospheric/tropospheric chemistry scheme (see Mulcahy et al., 2020, Table 2 for the list of reactions).</p> | <p>For the UKESM1-0-LL model, DMS concentrations are computed within the ocean biogeochemistry model MEDUSA (Yool et al., 2013) and interactively coupled with the global OGCM NEMO. DMS concentrations are linearly correlates with a composite variable that includes the logarithm of Chl a, light, and nutrients.</p> <p>DMS flux is calculated according to the air-to-sea gas transfer scheme of Liss and Slater (1974)<sup>1</sup>. DMS concentrations in the atmosphere are subsequently modified through a number of gas-phase aerosol precursor reactions within the stratospheric and tropospheric chemistry schemes of the UKESM1-0-LL model (Mulcahy et al., 2020).</p>            |

<sup>1</sup>The correct gas transfer scheme reference is Liss and Merlivat (1986): see Mulcahy et al., 2020, Sect. 2.4.2.

## References

- Bock, J., Michou, M., Nabat, P., Abe, M., Mulcahy, J. P., Olivié, D. J. L., Schwinger, J., Suntharalingam, P., Tjiputra, J., van Hulten, M., Watanabe, M., Yool, A., and Séférian, R. (2021). Evaluation of ocean dimethylsulfide concentration and emission in CMIP6 models. *Biogeosciences*, 18(12):3823–3860.
- Brévière, E. H., Bakker, D. C., Bange, H. W., Bates, T. S., Bell, T. G., Boyd, P. W., Duce, R. A., Garçon, V., Johnson, M. T., Law, C. S., Marandino, C. A., Olsen, A., Quack, B., Quinn, P. K., Sabine, C. L., and Saltzman, E. S. (2015). Surface ocean-lower atmosphere study: Scientific synthesis and contribution to Earth system science. *Anthropocene*, 12:54–68.
- Charlson, R. J., Lovelock, J. E., Andreae, M. O., and Warren, S. G. (1987). Oceanic phytoplankton, atmospheric sulphur, cloud albedo and climate. *Nature*, 326(6114):655–661. Publisher: Springer Science and Business Media LLC.
- Hamilton, D. S., Lee, L. A., Pringle, K. J., Reddington, C. L., Spracklen, D. V., and Carslaw, K. S. (2014). Occurrence of pristine aerosol environments on a polluted planet. *Proceedings of the National Academy of Sciences*, 111(52):18466–18471. Publisher: Proceedings of the National Academy of Sciences.
- Joge, S. D., Mansour, K., Simó, R., Galí, M., Steiner, N., Saiz-Lopez, A., and Mahajan, A. S. (2025). Climate warming increases global oceanic dimethyl sulfide emissions. *Proceedings of the National Academy of Sciences*, 122(23). Publisher: Proceedings of the National Academy of Sciences.
- McNabb, B. J. and Tortell, P. D. (2022). Improved prediction of dimethyl sulfide (DMS) distributions in the northeast subarctic Pacific using machine-learning algorithms. *Biogeosciences*, 19(6):1705–1721.
- Quinn, P. K. and Bates, T. S. (2011). The case against climate regulation via oceanic phytoplankton sulphur emissions. *Nature*, 480(7375):51–56.
- Wang, W.-L., Song, G., Primeau, F., Saltzman, E. S., Bell, T. G., and Moore, J. K. (2020). Global ocean dimethyl sulfide climatology estimated from observations and an artificial neural network. *Biogeosciences*, 17(21):5335–5354.
- Woodhouse, M. T., Carslaw, K. S., Mann, G. W., Vallina, S. M., Vogt, M., Halloran, P. R., and Boucher, O. (2010). Low sensitivity of cloud condensation nuclei to changes in the sea-air flux of dimethyl-sulphide. *Atmospheric Chemistry and Physics*, 10(16):7545–7559.



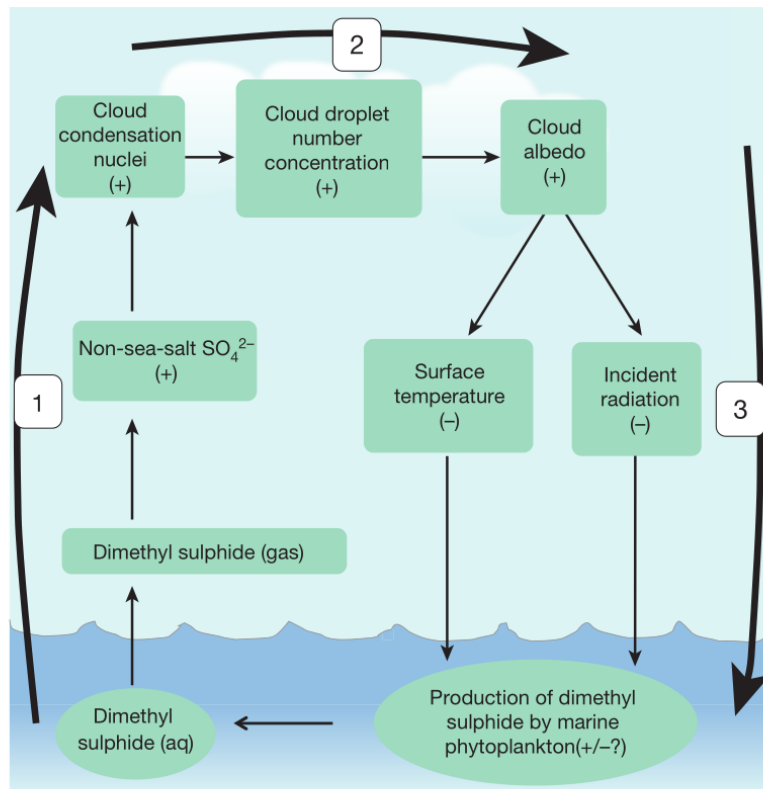

Figure 1 | Modified diagram of the climate feedback loop proposed by ref. 7.

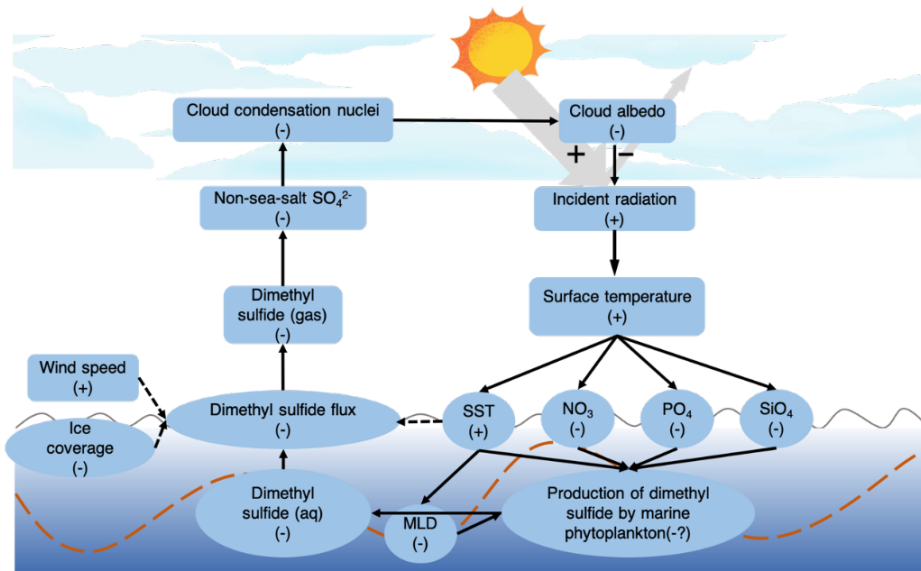

Figure 5. Modified diagram of the climate feedback loop of DMS.

Figure R1: Comparison of Figure 1 from QB11 (top) and Figure 5 from YW25 (bottom). The caption of Figure 1 from QB11 has been cropped: only the title is shown.
